# Supplementary material for: Colombian Ocular Diseases Epidemiology Study (CODES): incidence and sociodemographic characterisation of keratoconus between 2015 and 2020
Source: HighWire-hosted journal article supplement (doi:10.1136/bmjophth-2023-001238), 2023-04-01
Supplement: bmjophth-2023-001238supp001_data_supplement.pdf [file bmjophth-2023-001238supp001_data_supplement.pdf]

## Supplementary material 1: statical analysis

In this work, we use a statistical model for spatial data to make a prediction about what would have happened in the year 2020 on the incidence of the disease, this is done since the results are greatly affected by the pandemic. The statistical models for spatial data are divided by Cressie [1] into two broad classes: geostatistical models with continuous spatial support and models in a lattice, also called area models [2], where the data occur in a (possibly irregular) grid, with an enumerable set of vertices or locations . The two most common area models are conditional autoregressive (CAR) models and simultaneous autoregressive (SAR) models. These autoregressive models are used in many fields, including mapping disease rates [3], agriculture [4], econometrics [5], ecology [6] and image analysis [7]. In this paper we will focus on CAR models. CAR models are an example of the Gaussian Markov random fields [8] and the popular nested Laplace approach integrated methods [9].

The basis of these models is the Gaussian Markov Fields. Random fields are multivariate distributions that are generally used to describe the spatial association between variables X. A Markov random field extends the Markov chain concept to a spatial context and assumes that such a joint distribution of X satisfies:

$$f(X_i|\mathbf{X}_{-i}) = f(X_i|\mathbf{X}_{j\sim i}),$$

where,  $\mathbf{X}_{j\sim i}$  is the vector formed by all the components of X that are neighbors of i. A Gaussian Random Markov Field (GMRF) is a Markov field where the random vector distribution (finite-dimensional) is a normal or Gaussian distribution satisfying the conditional independence assumptions.

An n-dimensional random vector  $\mathbf{y}_{n \times 1} = (y_1, y_2, \dots, y_n)^T$ ,  $n < \infty$  has a n-variable distribution with mean vector  $\boldsymbol{\mu}_{n \times 1}$  and covariance matrix  $\boldsymbol{\Sigma}_{n \times n}$ , and its probability density function (fdp) assumes the as follows:

$$f_{\mathbf{y}}(\mathbf{y}) = (2\pi)^{-n/2} |\boldsymbol{\Sigma}|^{-1/2} \exp\left\{-\frac{1}{2}(\mathbf{y} - \boldsymbol{\mu})^T \boldsymbol{\Sigma}^{-1}(\mathbf{y} - \boldsymbol{\mu})\right\}.$$

This distribution will be denoted by  $\mathbf{y} \sim N(\boldsymbol{\mu}, \boldsymbol{\Sigma})$  where  $\boldsymbol{\mu}$  and  $\boldsymbol{\Sigma}$  only have:

28

29

$$\mu_i = E(y_i)$$

30

and  $\Sigma_{ij} = Cov(y_i, y_j)$ ,  $\Sigma_{ii} = Var(y_i)$  and  $Corr(y_i, y_j) = \Sigma_{ij}(\Sigma_{ii}\Sigma_{jj})^{-1/2}$ .

31

32

To build a GMRF we consider a graph  $G = (V, E)$  with  $n$  vertices where each vertex represents one of the components of the vector  $y = (y_1, y_2, \dots, y_n)$  and edges connect nodes that have some sort of association. A GMRF

33

34

assumes that  $\mathbf{y} = (y_1, y_2, \dots, y_n)^T \sim N(\boldsymbol{\mu}, \boldsymbol{\Sigma})$  and that the edges of the graph connect nodes  $i$  and  $j$  if

35

and only if  $y_i \perp y_j | y_{-ij}$ , that is, if  $y_i$  is independent of  $y_j$ , given the components of  $y$  except  $y_i$  and  $y_j$ . In a GMRF,

36

the covariance matrix brings information about the connections between the nodes through the precision matrix

37

$\Sigma^{-1} = Q$  which is a symmetric matrix and positive definite.

38

39

So, a random vector  $y = (y_1, y_2, \dots, y_n)^T \in R^n$  is called GMRF corresponding to a graph  $G = (V, E)$  with mean  $\mu$

40

and precision matrix  $Q > 0$ , if and only if the pdf of  $y$  has the following form:

41

42

$$\pi(\mathbf{y}) = (2\pi)^{-n/2} |\mathbf{Q}|^{1/2} \exp\left(-\frac{1}{2}(\mathbf{y} - \boldsymbol{\mu})^T \mathbf{Q}(\mathbf{y} - \boldsymbol{\mu})\right),$$

43

44

where the array  $Q$  satisfies the following condition:

45

$$Q_{ij} \neq 0 \Leftrightarrow \{i, j\} \in \mathcal{E}, \forall i \neq j.$$

46

47

If  $Q$  is a completely dense matrix, then  $G$  is fully connected, that is, the vertex is connected to all other vertices

48

in the graph. Let's focus on the case where  $Q$  is sparse. All results valid for the normal distribution will also

49

be valid for a GMRF. A detailed discussion of GMRF can be found in Rue and Held [8].

50

51

An example of a GMRF is the conditional autoregressive model or CAR model, in this case we consider a

52

geographic region that is partitioned into  $n$  subregions indexed by integers  $1, 2, \dots, n$  and assume that this

53 collection of sub-regions has a neighborhood system  $\{V_i : i = 1, \dots, n\}$ , where  $V_i$  denotes the collection of sub-  
 54 regions that, in a well-defined sense, are neighbors of the subregion  $i$ . In geographical terms,

55

56  $V_i = \{j : \text{the subregions } i \text{ and } j \text{ share a boundary}\}$ , to  $i \in \{1, 2, \dots, n\}$ ,

57

58 The neighborhood system is a key point in autoregressive or CAR models that are commonly used in spatial  
 59 statistics, the graphs that support the construction of the GMRF will be those that express these neighborhood  
 60 structures. In this context, the edges  $E$  in the graph  $G = (V, E)$ , represent the connections in the geographic  
 61 structure and, consequently, define the neighbors that are used to model spatial dependence. The components  
 62 of the vector  $y$  are nodes of the graph.

63

64 Let  $y_1, \dots, y_n$  be the observations made in the areas  $1, \dots, n$ . Let us denote by  $j \sim i$  that node  $j$  is a neighbor of node  
 65  $i$ . The term conditional, in the CAR model is used because each element of the random process is conditionally  
 66 specified in the values of neighboring nodes, the CAR model assumes that the complete conditional  
 67 distributions are normal distributions. Then, we assuming that,

68

$$y_i | y_{-i} \sim N\left(\mu_i + \rho_G \overline{(y - \mu)_i}, \frac{\sigma_G^2}{d_i^G}\right),$$

69

70

71 where  $\sigma_G^2/d_i^G$  is the conditional variance of  $y_i | y_{-i}$ ,  $\rho_G$  is a proportionality constant,  $d_i^G$  is the number of  
 72 neighbors of node  $i$  in the graph  $G$ , the average of the neighbors of node  $i$  is the:

73

$$\overline{(y - \mu)_i} = \sum_{\mathcal{E}^G} (d_i^G)^{-1} (y_j - \mu_j)$$

74 and,

75

$$\mathcal{E}^G = \{(i, j) \in E(G) : j \sim i\}$$

76 is the set of edges that belong to the graph  $G$ . Consider the adjacency matrix  $A_G = (a_{ij})$  such that  $a_{ii} = 0$ ,  $a_{ij} = 1$

77 if  $i$  and  $j$   $a_{ij} = 0$  if  $i \not\sim j$  and  $M_G = \text{diag}\{d_1^G, d_2^G, \dots, d_n^G\}$ .

78

79 Besag uses Brook's lemma [2, 10] and shows that when the matrix  $(M_G - \rho_G A_G)^{-1}$  is positive definite and  
80 symmetric the joint distribution for  $y$  is:

$$y \sim N(\mu, (\Sigma_{CAR}^G)^{-1}),$$

81

82

83 where  $(\Sigma_{CAR}^G)^{-1} = \sigma_G^2 (M_G - \rho_G A_G)^{-1}$ . For the covariance matrix to be positive definite, it

84 is necessary that  $\rho_G < \frac{1}{\lambda_1}$  where  $\lambda_1$  is the smallest eigenvalue of the matrix  $M_G^{-1/2} A_G M_G^{-1/2}$  Banerjee et al  
85 [2].

86

87 In conclusion, the CAR model approach visualizes the geographic domain as an undirected graph with a vertex  
88 in each region and an edge between two vertices if the corresponding regions share a geographic edge. This  
89 creates well-defined neighbors for each region, which are used to define the joint or conditional distribution.  
90 The distribution will be the multivariate normal distribution. All analysis of the CAR model is concentrated  
91 on the covariance matrix  $\Sigma$ , which is defined by the graph of the geographic domain and the parameter  $\rho$ .

92

### 93 REFERENCES:

94 1. Cressie NAC. Statistics for spatial data. Rev. ed. New York: Wiley; 1993.

95 2. Banerjee S, Carlin BP, Gelfand AE, Banerjee S. Hierarchical Modeling and Analysis for Spatial Data. 0  
96 edition. Chapman and Hall/CRC; 2003.

97 3. Elliott P, Wartenberg D. Spatial Epidemiology: Current Approaches and Future Challenges. Environmental  
98 Health Perspectives. 2004;112:998–1006.

99 4. Besag J, Higdon D. Bayesian analysis of agricultural field experiments. J Royal Statistical Soc B.  
100 1999;61:691–746.

101 5. LeSage J, Pace RK. Introduction to Spatial Econometrics. 0 edition. Chapman and Hall/CRC; 2009.

- 102 6. Arslan O, Akyürek Ö. Spatial Modelling of Air Pollution from PM10 and SO2 concentrations during Winter  
103 Season in Marmara Region (2013-2014). *International Journal of Environment and Geoinformatics*. 2018;5:1–  
104 16.
- 105 7. Besag J. On the Statistical Analysis of Dirty Pictures. *Journal of the Royal Statistical Society Series B*  
106 (Methodological). 1986;48:259–302.
- 107 8. Rue H, Held L. *Gaussian Markov Random Fields*. 0 edition. Chapman and Hall/CRC; 2005.
- 108 9. Rue H, Martino S, Chopin N. Approximate Bayesian inference for latent Gaussian models by using  
109 integrated nested Laplace approximations. *Journal of the Royal Statistical Society: Series B (Statistical*  
110 *Methodology)*. 2009;71:319–92.
- 111 10. Besag J. Spatial Interaction and the Statistical Analysis of Lattice Systems. *Journal of the Royal Statistical*  
112 *Society Series B (Methodological)*. 1974;36:192–236.
- 113
